# Supplementary material
Source: Springer Nature journal article supplement (https://www.springermedizin.de/resource/supplementary/12890_2010_219_MOESM2_ESM.pdf/9504728)
Supplement: MOESM2 [file 9504728]

# % of subjects

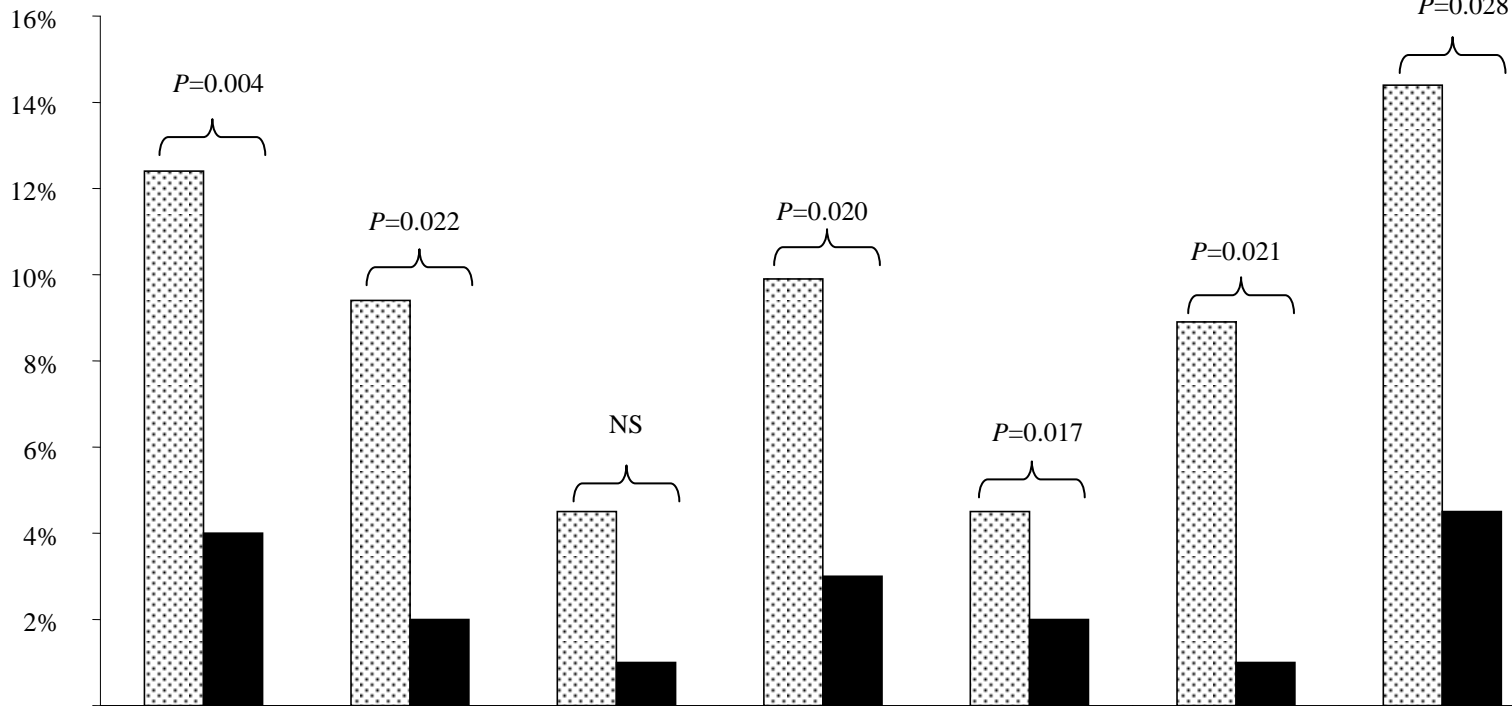

|             | Heartburn | Regurgitation | Abdominal or chest pain | Abdominal distension | Dysphagia | Cough | Belching |
|-------------|-----------|---------------|-------------------------|----------------------|-----------|-------|----------|
| ■ Asthmatic | 12.4%     | 9.4%          | 4.5%                    | 9.9%                 | 4.5%      | 8.9%  | 14.4%    |
| ■ Control   | 4.0%      | 2.0%          | 1.0%                    | 3.0%                 | 2.0%      | 1.0%  | 4.5%     |

## Symptoms
